# Supplementary material for: Longitudinal metabolite profiling of Streptococcus pneumoniae-associated community-acquired pneumonia
Source: PubMed Central journal article supplement (PMC10914916; doi:10.1007/s11306-024-02091-5), 2024-03-05
Supplement: 11306_2024_2091_MOESM1_ESM.pdf [file 11306_2024_2091_MOESM1_ESM.pdf]

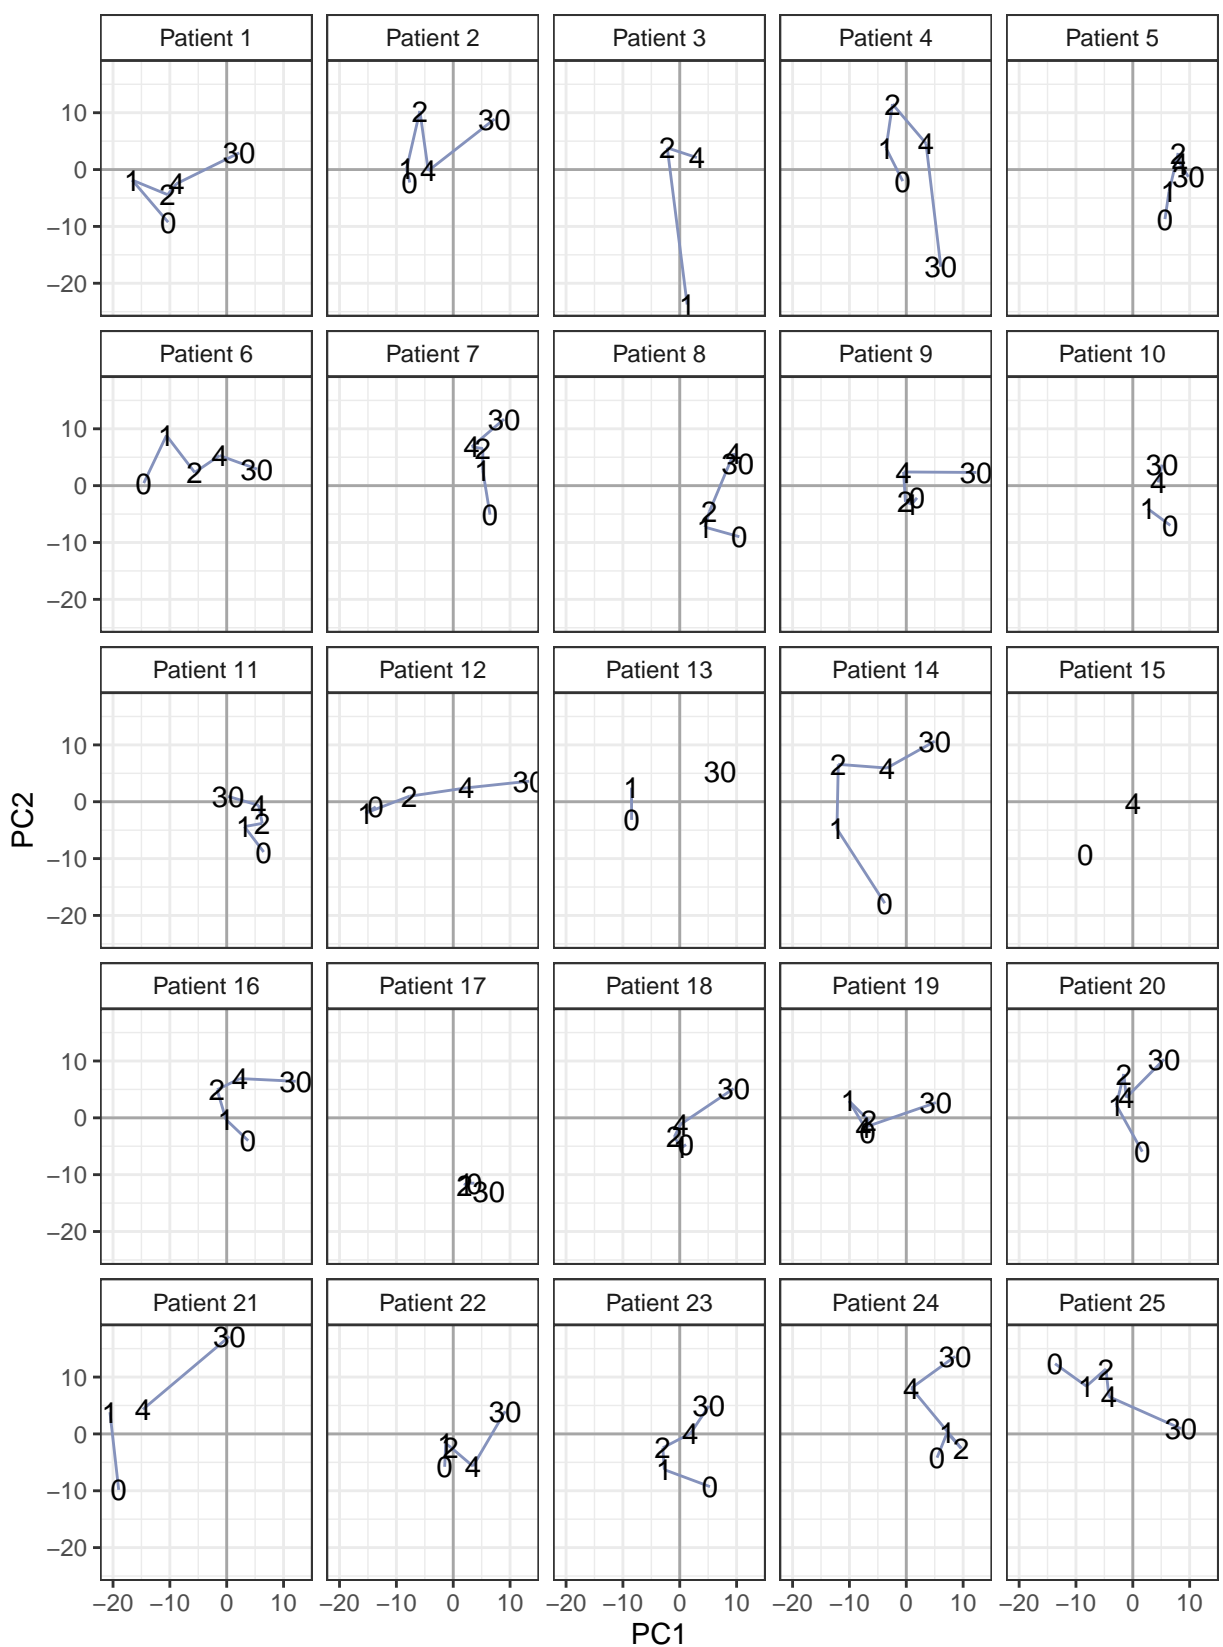

Figure S1. PCA score plots for each patient. For each patient, the time points are labelled and connected with lines. Abbreviations: PC: principal component
