# Supplementary material for: Longitudinal metabolite profiling of Streptococcus pneumoniae-associated community-acquired pneumonia
Source: PubMed Central journal article supplement (PMC10914916; doi:10.1007/s11306-024-02091-5), 2024-03-05
Supplement: 11306_2024_2091_MOESM2_ESM.pdf [file 11306_2024_2091_MOESM2_ESM.pdf]

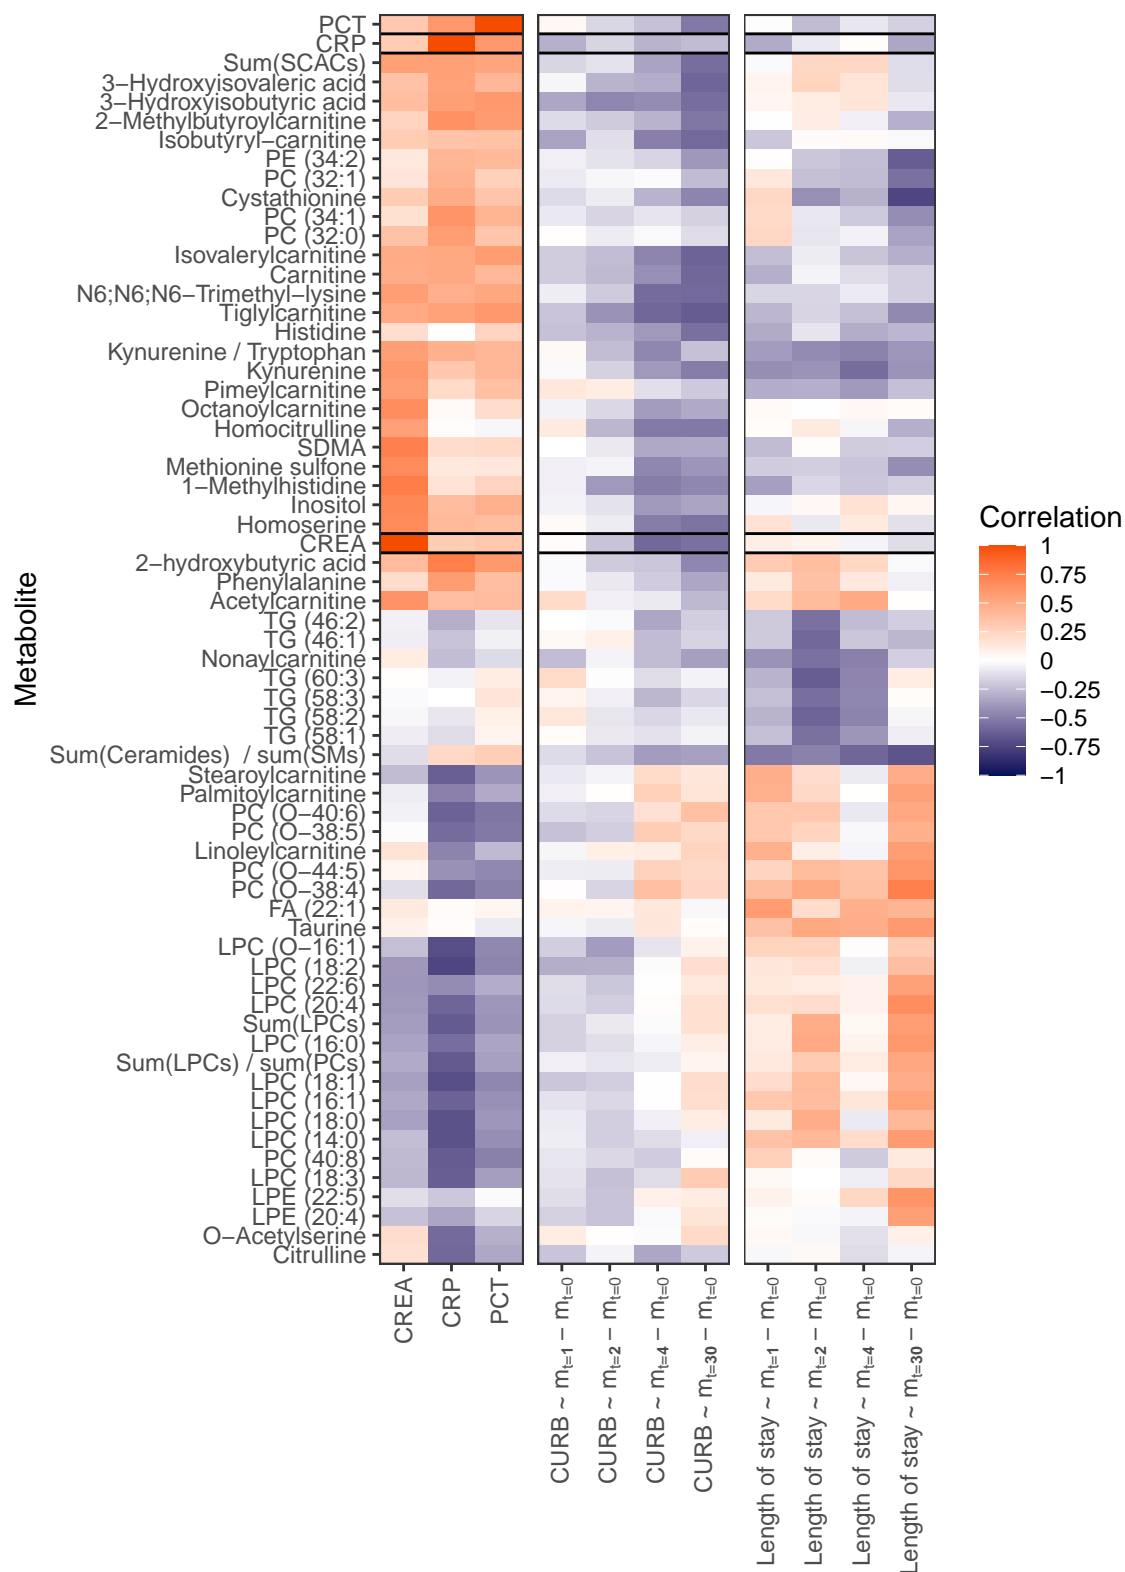

Figure S2. The correlations between metabolites and creatinine, CRP, and PCT over time; and the correlations of the CURB score and length of stay with a change of the metabolites between day  $k$  and day 0, where the change in metabolite levels is denoted by  $m_{t=k} - m_{t=0}$ .
